# Supplementary material for: Isoquercitrin Attenuates Steatohepatitis by Inhibition of the Activated NLRP3 Inflammasome through HSP90
Source: MDPI journal article supplement (doi:10.3390/ijms24108795), 2023-05-15
Supplement: s1 [file s1]

## Supplementary Materials

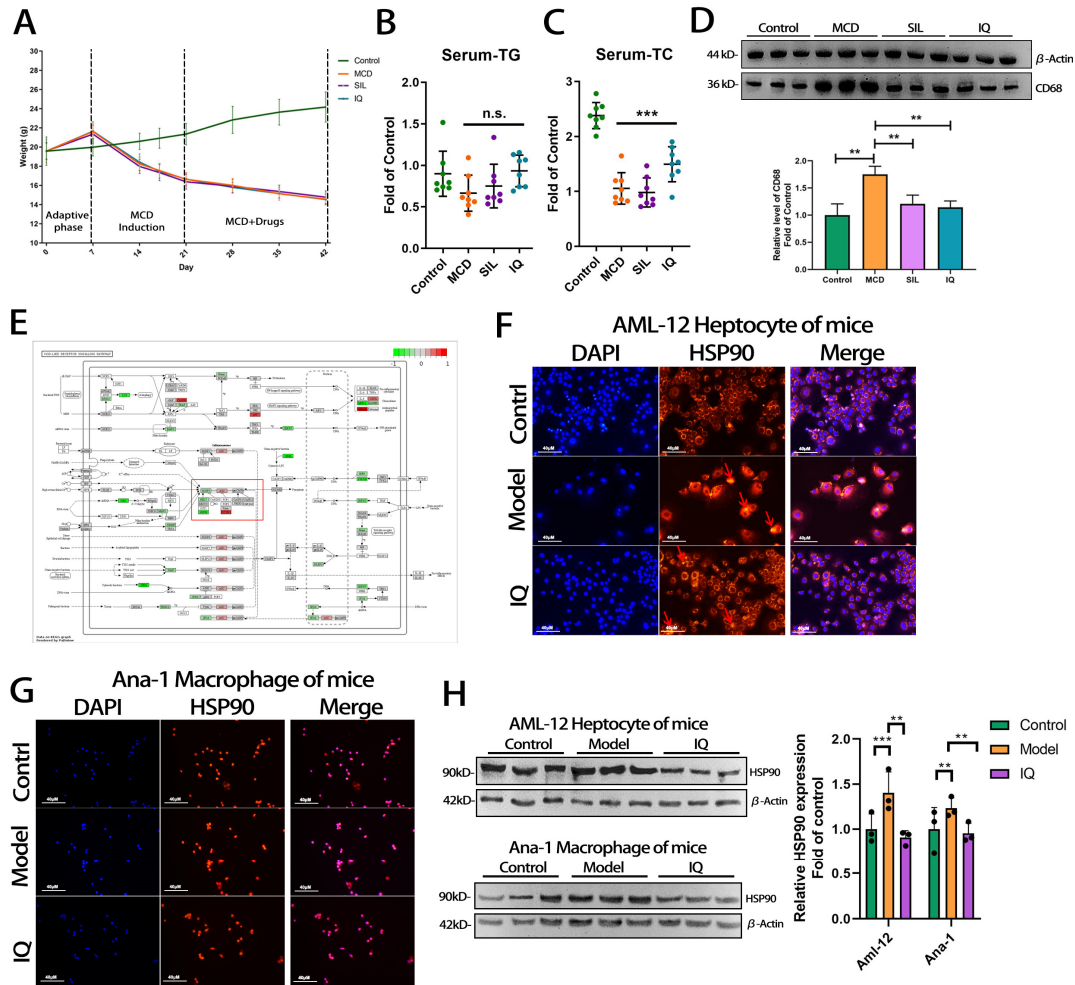

**Figure S1. supplementary data.** (A) Weight of mice. (B) Serum TG of mice. (C) Serum TC of mice. (D) Relative protein expression of CD68 of the liver tissue of mice. (E) Gene expression of the NOD-like pathway. (F) Immunofluorescence expression of HSP90 in AML-12 cells. (G) Immunofluorescence expression of HSP90 in Ana-1 cells. (H) Relative protein expression of HSP90 in two cells. The bar indicates mean  $\pm$  SD. n.s.  $p > 0.05$ , \*\*  $p < 0.01$ , or \*\*\*  $p < 0.001$  represents the significance of differences, and  $P < 0.05$  is considered as statistically significant. The significance is calculated by ANOVA, followed by the Turkey's test or the Kruskal-Wallis test for the nonparametric test.
